# Supplementary material for: Two series of pH-dependent lanthanide complexes showing solvent-induced single crystal to single crystal transformation, sorption and luminescence properties
Source: Royal Society of Chemistry journal article supplement (doi:10.1039/c5ce00263j), 2015-01-01
Supplement: c5ce00263j1.pdf [file c5ce00263j1.pdf]

## *Supporting information for*

### **Two series of pH-dependent lanthanide coordination polymers demonstrating solvent-induced single crystal to single crystal transformation, sorption and luminescent properties**

**Lina Zhang,<sup>a,b</sup> Chao Zhang,<sup>a</sup> Bin Zhang,<sup>a</sup> Chenxia Du,<sup>\*a</sup> and Hongwei Hou<sup>\*a</sup>**

<sup>a</sup> *College of Chemistry and Molecular Engineering, Zhengzhou University, Zhengzhou, 450052, P.R. China.*

<sup>b</sup> *College of Physics and Chemistry, Henan Polytechnic University, Jiaozuo 454000, P. R. China.*

*E-mail: [dcx@zzu.edu.cn](mailto:dcx@zzu.edu.cn), [houghongw@zzu.edu.cn](mailto:houghongw@zzu.edu.cn)*

This file includes **Figures S1–S13** and **Tables S1–S6**.

**Figure S1.** (a) Illustration of each SBU connected to six adjacent SBUs through PA<sup>2-</sup> anions in **8**. (b) 3D **pcu** network of **8**.

**Figure S2.** (a) Illustration of each SBU connected to six adjacent SBUs through PA<sup>2-</sup> anions in **8a**. (b) 3D **pcu** network of **8a**.

**Figure S3.** Representations of lattice solvent molecules filled in the 1D channel of (a) **8a**, (b) **8a/acetone**, (c) **8a/H<sub>2</sub>O** and (d) **8a/EtOH**.

**Figure S4.** The simulated and experimental PXRD patterns for compounds **1–10**.

**Figure S5.** The simulated and experimental PXRD patterns for **7a–10a**

**Figure S6.** The simulated and experimental PXRD patterns for **8a/acetone**.

**Figure S7.** The simulated and experimental PXRD patterns for **8a/H<sub>2</sub>O**.

**Figure S8.** The simulated and experimental PXRD patterns for **8a/EtOH**.

**Figure S9.** TGA plots for selected compounds of **series A**.

**Figure S10.** TGA plots for selected compounds of **series B**.

**Figure S11.** TGA plots for complexes **8a/acetone**, **8a/H<sub>2</sub>O** and **8a/EtOH**.

**Figure S12.**  $^1\text{H}$  NMR spectra in  $\text{CDCl}_3$  of the supernatant liquids resulted from the reactions of **8a/dry** with acetone in various molar ratios.

**Figure S13.** PXRD patterns for compound **8a/acetone** prepared from: original compound **8a**, original **8a/dry** (**8a/acetone** 1<sup>st</sup> cycle) and regenerated **8a/dry** (**8a/acetone** 2<sup>nd</sup> cycle).

**Table S1.** Crystallographic data for compounds **1-6**.

**Table S2.** Crystallographic data for compounds **7-10**.

**Table S3.** Crystallographic data for compounds **7a-10a**.

**Table S4.** Crystallographic data for the Solvent Exchanged Compounds of **8a**.

**Table S5.** Selected Bond Distances and Angles for Compounds **1-10** and **8a-10a**.

**Table S6.** Selected Bond Distances for the Solvent Exchanged Compounds of **8a**.

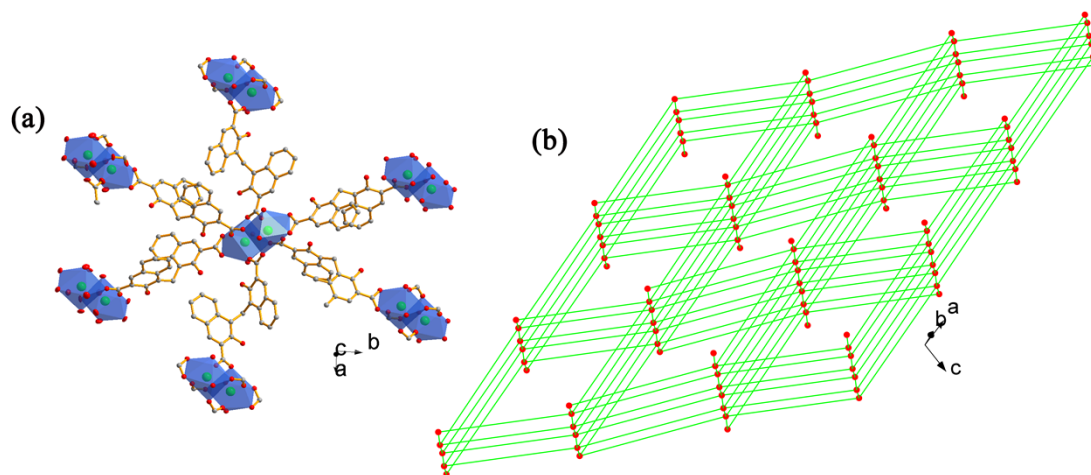

**Figure S1.** (a) Illustration of each SBU connected to six adjacent SBUs through  $\text{PA}^{2-}$  anions in **8**. (b) 3D **pcu** network of **8**. (Color code:  $[\text{Ho}_2(\text{COO})_6(\text{H}_2\text{O})_3(\text{DMF})]$ , red ball;  $\text{PA}^{2-}$  anion, green line.)

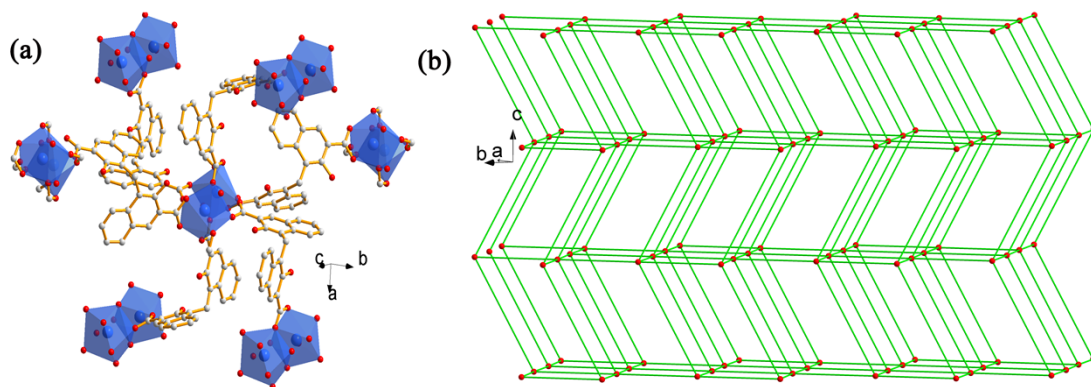

**Figure S2.** (a) Illustration of each SBU connected to six adjacent SBUs through PA<sup>2-</sup> anions in **8a**. (b) 3D pcu network of **8a**. (Color code: [Ho<sub>2</sub>(COO)<sub>6</sub>(H<sub>2</sub>O)<sub>2</sub>(DMF)<sub>2</sub>], red ball; PA<sup>2-</sup> anion, green line.)

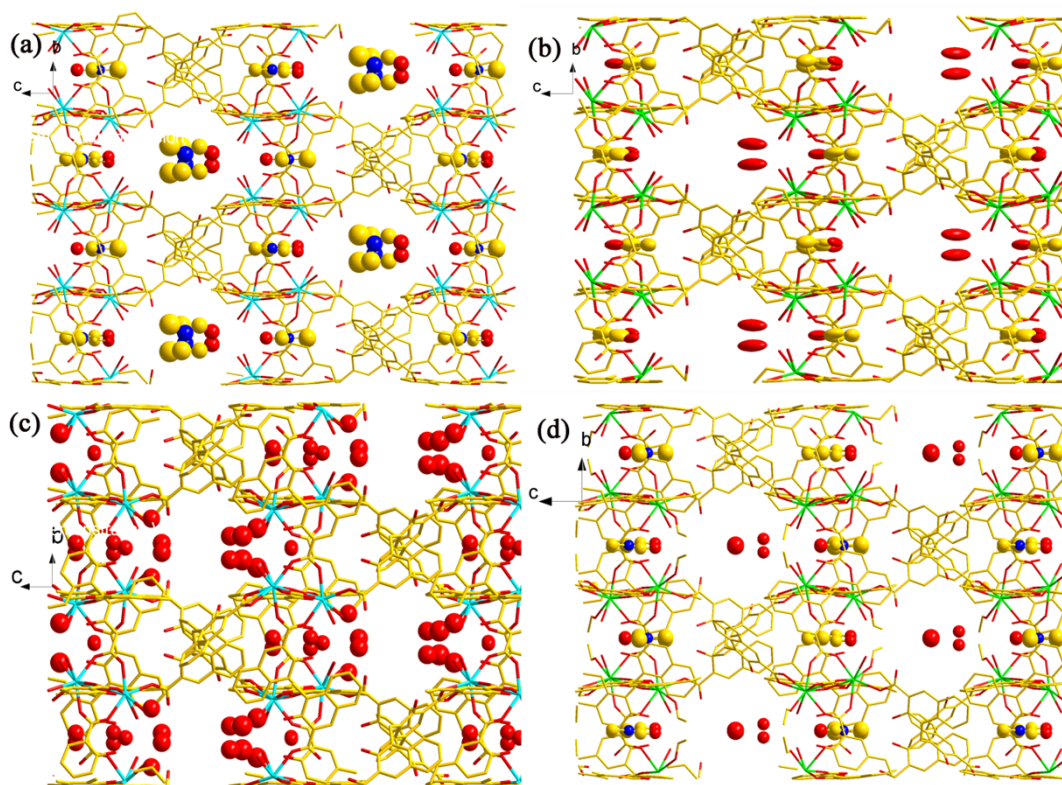

**Figure S3.** Representations of lattice solvent molecules filled in the 1D channel of (a) **8a**, (b) **8a/acetone**, (c) **8a/H<sub>2</sub>O** and (d) **8a/EtOH**. (Hydrogen atoms were omitted for clarity.)

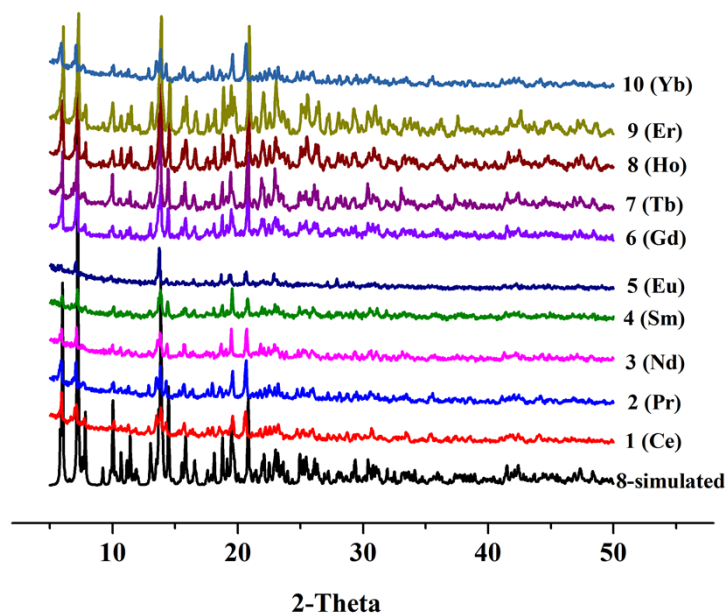

**Figure S4.** The simulated and experimental PXRD patterns for compounds 1–10.

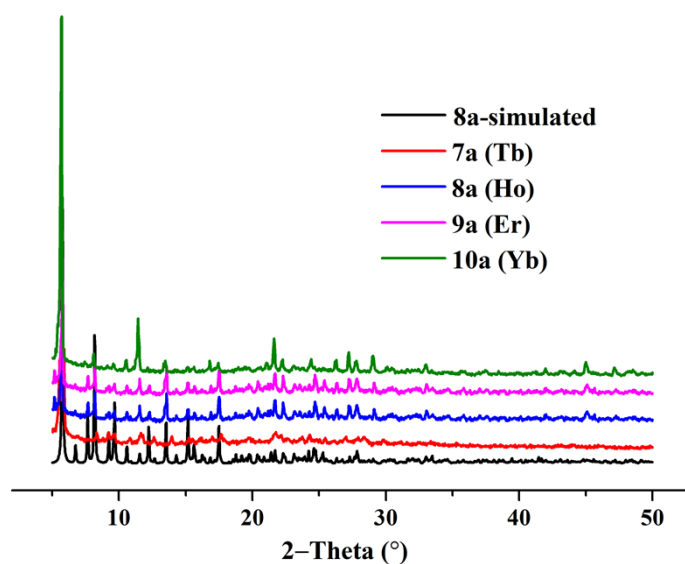

**Figure S5.** The simulated and experimental PXRD patterns for 7a–10a.

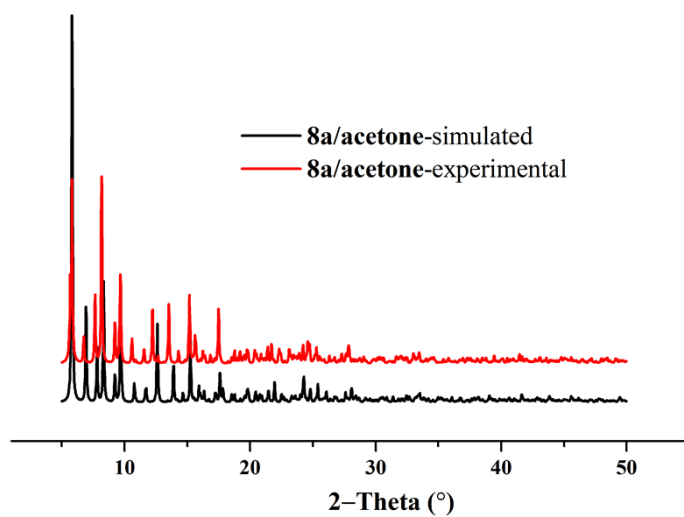

Figure S6. The simulated and experimental PXR D patterns for 8a/acetone.

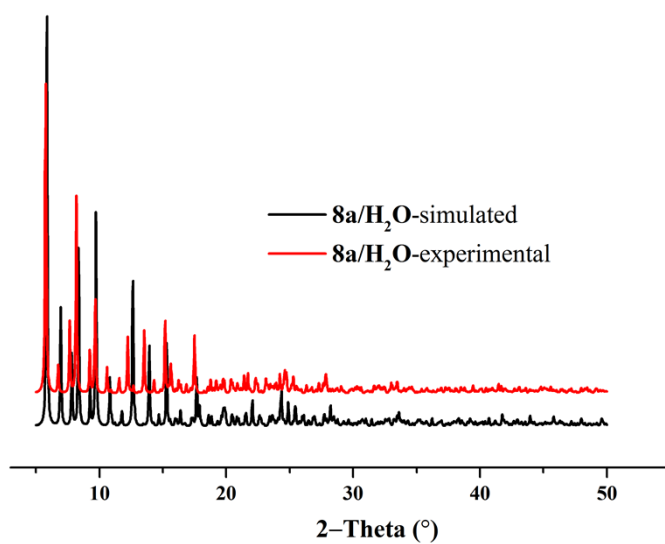

Figure S7. The simulated and experimental PXR D patterns for 8a/H<sub>2</sub>O.

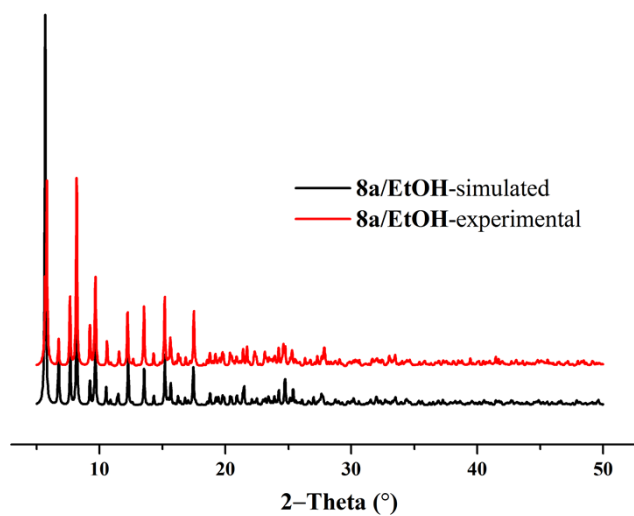

Figure S8. The simulated and experimental PXR D patterns for 8a/EtOH.

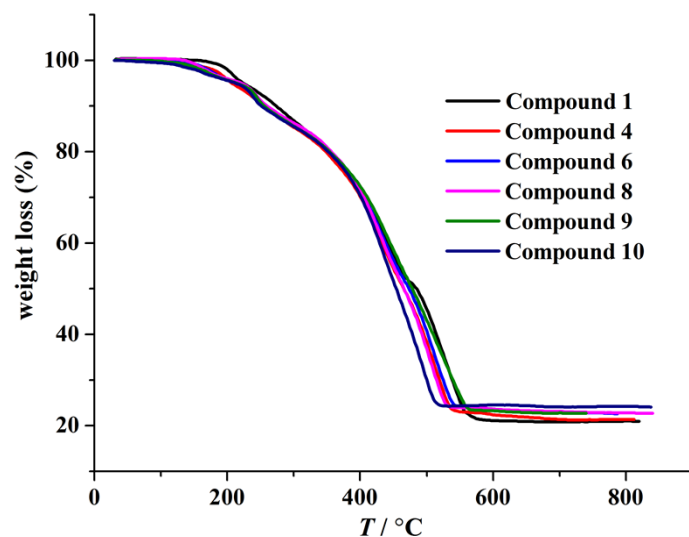

Figure S9. TGA plots for selected compounds of series A.

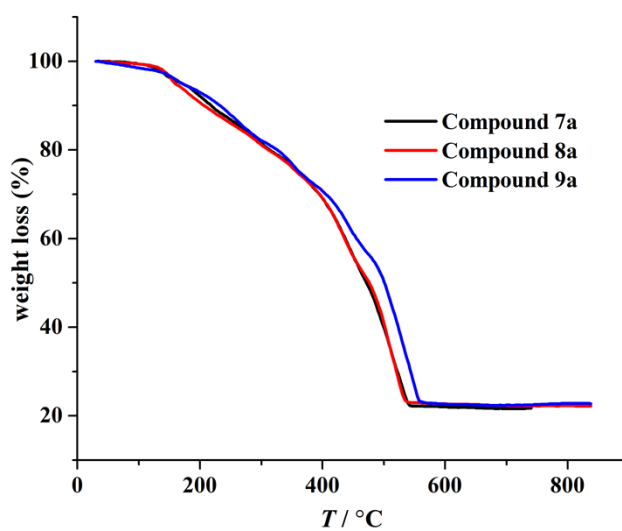

Figure S10. TGA plots for selected compounds of series B.

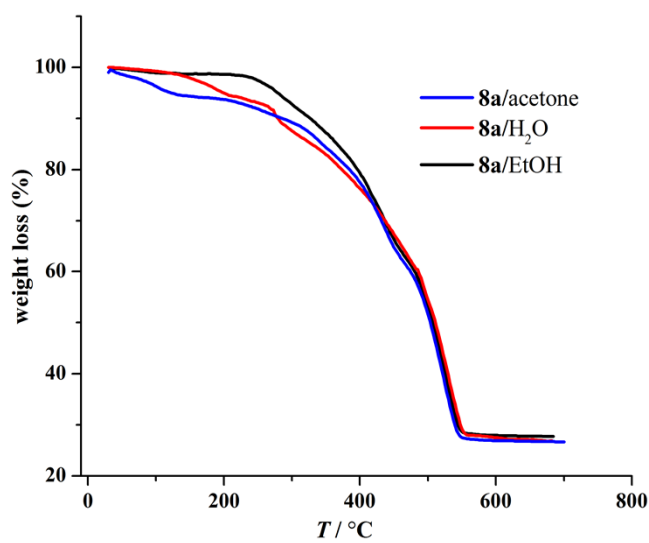

Figure S11. TGA plots for complexes **8a/acetone**, **8a/H<sub>2</sub>O** and **8a/EtOH**.

## Acetone adsorption data

The exact quantities of the reactants in the various reactions performed are: *x0.5* [acetone (2.4  $\mu\text{L}$ , 1.89 mg, 0.0324 mmol, 0.5 eq.), dichloromethane (6.3  $\mu\text{L}$ , 8.30 mg, 0.0972 mmol), **8a/dry** (0.1011 g, 0.0648 mmol) in 2mL  $\text{CDCl}_3$ ], *x1* [acetone (4.8  $\mu\text{L}$ , 3.78 mg, 0.0648 mmol, 1 eq.), dichloromethane (12.6  $\mu\text{L}$ , 16.60 mg, 0.1944 mmol), **8a/dry** (0.1011 g, 0.0648 mmol) in 2mL  $\text{CDCl}_3$ ], *x1.5* [acetone (7.2  $\mu\text{L}$ , 5.67 mg, 0.0972 mmol, 1.5 eq.), dichloromethane (18.9  $\mu\text{L}$ , 24.90 mg, 0.2916 mmol), **8a/dry** (0.1011 g, 0.0648 mmol) in 2mL  $\text{CDCl}_3$ ], *x2* [acetone (9.6  $\mu\text{L}$ , 7.56 mg, 0.1296 mmol, 2 eq.), dichloromethane (25.2  $\mu\text{L}$ , 33.20 mg, 0.3888 mmol), **8a/dry** (0.1011 g, 0.0648 mmol) in 2mL  $\text{CDCl}_3$ ], *x2.5* [acetone (12.0  $\mu\text{L}$ , 9.45 mg, 0.1620 mmol, 2.5 eq.), dichloromethane (31.5  $\mu\text{L}$ , 41.5 mg, 0.4860 mmol), **8a/dry** (0.1011 g, 0.0648 mmol) in 2mL  $\text{CDCl}_3$ ], *x3* [acetone (14.4  $\mu\text{L}$ , 11.34 mg, 0.1944 mmol, 3 eq.), dichloromethane (37.8  $\mu\text{L}$ , 49.80 mg, 0.5832 mmol), **8a/dry** (0.1011 g, 0.0648 mmol) in 2mL  $\text{CDCl}_3$ ], *x3.5* [acetone (16.8  $\mu\text{L}$ , 13.23 mg, 0.2268 mmol, 3.5 eq.), dichloromethane (44.1  $\mu\text{L}$ , 58.10 mg, 0.6804 mmol), **8a/dry** (0.1011 g, 0.0648 mmol) in 2mL  $\text{CDCl}_3$ ].

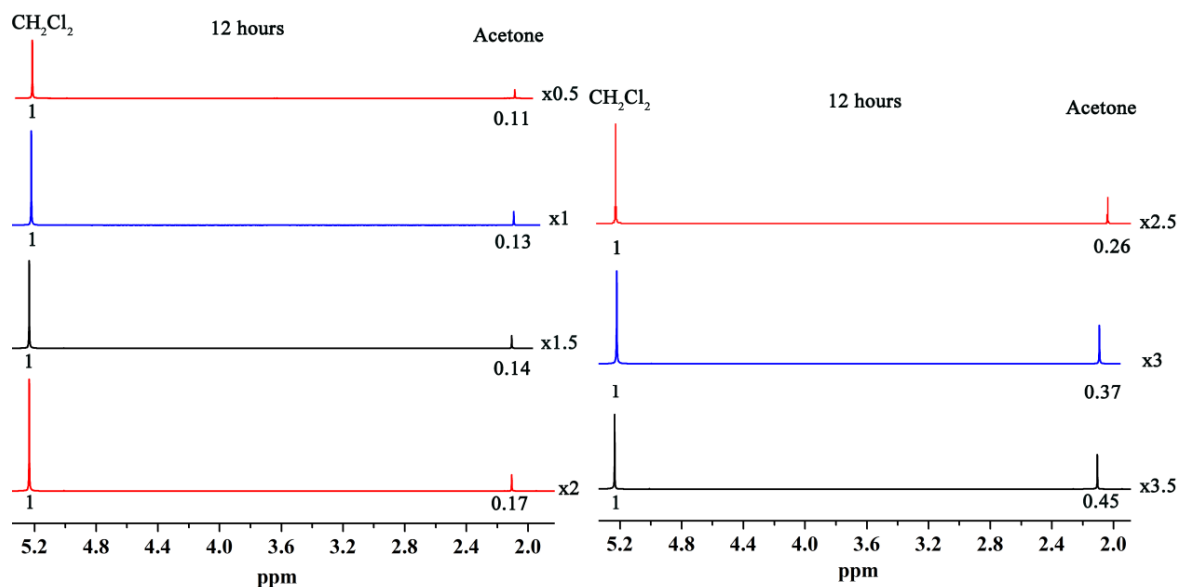

**Figure S12.**  $^1\text{H}$  NMR spectra in  $\text{CDCl}_3$  of the supernatant liquids resulted from the reactions of **8a/dry** with acetone in various molar ratios.

As shown in **Figure S12**, the peaks at 2.17 ppm and 5.30 ppm correspond to the methyl groups of acetone and methylene group of dichloromethane respectively. The concentrations of acetone

after the sorption processes were determined using as reference the dichloromethane that is not absorbed by **8a/dry** at these reaction conditions (i.e magnetic stirring at room temperature and atmospheric pressure) and thus its concentration remains unchanged after the treatment of the solution with **8a/dry**. For each experiment, the initial concentrations of acetone and dichloromethane were 1:3 (i.e. the ratio of the peak integrals for the H atom of acetone and dichloromethane were equal to 1 in the  $^1\text{H}$  NMR spectra of the initial solutions).

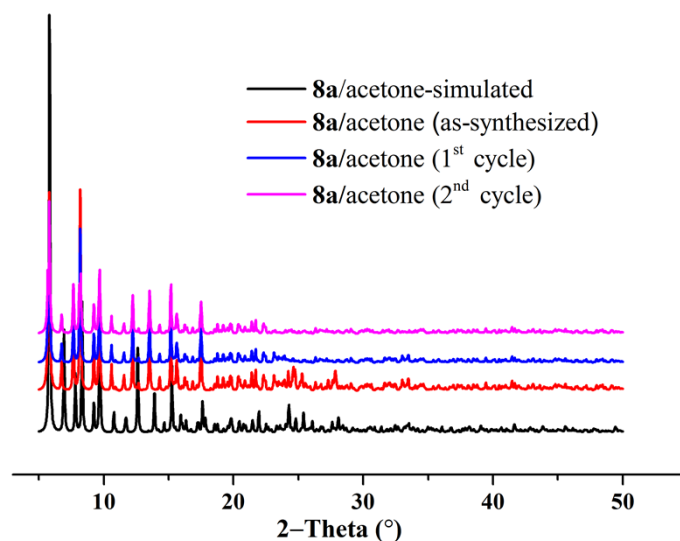

**Figure S13.** PXRD patterns for compound **8a/acetone** prepared from: original compound **8a**; original **8a/dry** (**8a/acetone** 1<sup>st</sup> cycle) and regenerated **8a/dry** (**8a/acetone** 2<sup>nd</sup> cycle).

**Table S1.** Crystallographic data for compounds **1-6**

|                            | <b>1</b>                                                       | <b>2</b>                                                               | <b>3</b>                                                               | <b>4</b>                                                               | <b>5</b>                                                               | <b>6</b>                                                               |
|----------------------------|----------------------------------------------------------------|------------------------------------------------------------------------|------------------------------------------------------------------------|------------------------------------------------------------------------|------------------------------------------------------------------------|------------------------------------------------------------------------|
| Empirical formula          | $\text{C}_{81}\text{H}_{74}\text{N}_4\text{O}_{24}\text{Ce}_2$ | $\text{C}_{79.5}\text{H}_{71.5}\text{N}_{3.5}\text{O}_{24}\text{Pr}_2$ | $\text{C}_{79.5}\text{H}_{71.5}\text{N}_{3.5}\text{Nd}_2\text{O}_{24}$ | $\text{C}_{79.5}\text{H}_{71.5}\text{N}_{3.5}\text{O}_{24}\text{Sm}_2$ | $\text{C}_{79.5}\text{H}_{71.5}\text{Eu}_2\text{N}_{3.5}\text{O}_{24}$ | $\text{C}_{79.5}\text{H}_{71.5}\text{Gd}_2\text{N}_{3.5}\text{O}_{24}$ |
| Formula weight             | 1767.63                                                        | 1741.66                                                                | 1748.31                                                                | 1760.55                                                                | 1763.79                                                                | 1774.35                                                                |
| $T$ (K)                    | 291.15                                                         | 291.15                                                                 | 291.15                                                                 | 291.15                                                                 | 291.15                                                                 | 291.15                                                                 |
| crystal system             | monoclinic                                                     | monoclinic                                                             | monoclinic                                                             | monoclinic                                                             | monoclinic                                                             | monoclinic                                                             |
| space group                | $\text{P2}_1/\text{c}$                                         | $\text{P2}_1/\text{c}$                                                 | $\text{P2}_1/\text{c}$                                                 | $\text{P2}_1/\text{c}$                                                 | $\text{P2}_1/\text{c}$                                                 | $\text{P2}_1/\text{c}$                                                 |
| $a$ (Å)                    | 14.2831 (2)                                                    | 14.26463 (15)                                                          | 14.21191 (16)                                                          | 14.1785 (2)                                                            | 14.13790 (15)                                                          | 14.11880 (17)                                                          |
| $b$ (Å)                    | 29.8625 (4)                                                    | 29.8504 (3)                                                            | 29.7396 (3)                                                            | 29.6106 (4)                                                            | 29.5535 (3)                                                            | 29.5116 (3)                                                            |
| $c$ (Å)                    | 18.2631 (3)                                                    | 18.2812 (2)                                                            | 18.3087 (3)                                                            | 18.3573 (3)                                                            | 18.3735 (3)                                                            | 18.3851 (3)                                                            |
| $\alpha$ (°)               | 90.00                                                          | 90.00                                                                  | 90                                                                     | 90                                                                     | 90.00                                                                  | 90.00                                                                  |
| $\beta$ (°)                | 106.9678 (17)                                                  | 107.0122 (12)                                                          | 107.0015 (14)                                                          | 107.0285 (17)                                                          | 107.0296 (13)                                                          | 107.0169 (14)                                                          |
| $\gamma$ (°)               | 90.00                                                          | 90.00                                                                  | 90                                                                     | 90                                                                     | 90.00                                                                  | 90.00                                                                  |
| $V$ (Å <sup>3</sup> )      | 7450.7 (2)                                                     | 7443.61 (15)                                                           | 7400.10 (16)                                                           | 7369.1 (2)                                                             | 7340.32 (15)                                                           | 7325.10 (16)                                                           |
| $Z$                        | 4                                                              | 4                                                                      | 4                                                                      | 4                                                                      | 4                                                                      | 4                                                                      |
| $D_c$ [g/cm <sup>3</sup> ] | 1.570                                                          | 1.547                                                                  | 1.562                                                                  | 1.581                                                                  | 1.592                                                                  | 1.603                                                                  |
| $\mu$ (mm <sup>-1</sup> )  | 10.024                                                         | 1.376                                                                  | 11.28                                                                  | 1.661                                                                  | 1.777                                                                  | 1.879                                                                  |
| $F(000)$                   | 3556.0                                                         | 3500.0                                                                 | 3506                                                                   | 3530                                                                   | 3546.0                                                                 | 3546.0                                                                 |



|                              |        |        |        |        |        |        |
|------------------------------|--------|--------|--------|--------|--------|--------|
| Reflections                  | 27291  | 32578  | 26071  | 32358  | 41239  | 31199  |
| Unique reflections           | 12916  | 15633  | 13073  | 15041  | 14949  | 14947  |
| Goodness-of-fit              | 1.025  | 1.017  | 1.017  | 1.020  | 1.037  | 1.042  |
| $R_1^a$ ( $I > 2\sigma(I)$ ) | 0.0376 | 0.0369 | 0.0409 | 0.0393 | 0.0355 | 0.0332 |
| $wR_2^b$ (all data)          | 0.1047 | 0.0873 | 0.1067 | 0.0917 | 0.0808 | 0.0771 |
| $R(\text{int})$              | 0.0258 | 0.0234 | 0.0282 | 0.0340 | 0.0324 | 0.0238 |

$$^a R_1 = \frac{\sum |F_o| - |F_c|}{\sum |F_o|}, \quad ^b wR_2 = \left[ \frac{\sum [w(F_o^2 - F_c^2)^2]}{\sum w(F_o^2)^2} \right]^{1/2}$$

**Table S2.** Crystallographic data for compounds **7-10**

|                              | <b>7</b>                                                                             | <b>8</b>                                                                       | <b>9</b>                                                                       | <b>10</b>                                                                      |
|------------------------------|--------------------------------------------------------------------------------------|--------------------------------------------------------------------------------|--------------------------------------------------------------------------------|--------------------------------------------------------------------------------|
| Empirical formula            | C <sub>79.5</sub> H <sub>71.5</sub> N <sub>3.5</sub> O <sub>24</sub> Tb <sub>2</sub> | C <sub>78</sub> H <sub>71</sub> Ho <sub>2</sub> N <sub>3</sub> O <sub>25</sub> | C <sub>78</sub> H <sub>71</sub> Er <sub>2</sub> N <sub>3</sub> O <sub>25</sub> | C <sub>78</sub> H <sub>71</sub> N <sub>3</sub> O <sub>25</sub> Yb <sub>2</sub> |
| Formula weight               | 1777.19                                                                              | 1780.22                                                                        | 1784.88                                                                        | 1796.43                                                                        |
| $T$ (K)                      | 291.15                                                                               | 291.15                                                                         | 291.15                                                                         | 291.15                                                                         |
| crystal system               | monoclinic                                                                           | monoclinic                                                                     | monoclinic                                                                     | monoclinic                                                                     |
| space group                  | P2 <sub>1</sub> /c                                                                   | P2 <sub>1</sub> /c                                                             | P2 <sub>1</sub> /c                                                             | P2 <sub>1</sub> /c                                                             |
| $a$ (Å)                      | 14.0878(3)                                                                           | 14.042(3)                                                                      | 14.0233(4)                                                                     | 14.0088(4)                                                                     |
| $b$ (Å)                      | 29.4702(7)                                                                           | 29.367(6)                                                                      | 29.3110(8)                                                                     | 29.2317(6)                                                                     |
| $c$ (Å)                      | 18.4237(4)                                                                           | 18.456(4)                                                                      | 18.4183(9)                                                                     | 18.4902(5)                                                                     |
| $\alpha$ (°)                 | 90                                                                                   | 90.00                                                                          | 90.00                                                                          | 90.00                                                                          |
| $\beta$ (°)                  | 107.034(2)                                                                           | 107.15(3)                                                                      | 107.095(4)                                                                     | 107.187(3)                                                                     |
| $\gamma$ (°)                 | 90                                                                                   | 90.00                                                                          | 90.00                                                                          | 90.00                                                                          |
| $V$ (Å <sup>3</sup> )        | 7313.4(3)                                                                            | 7273(3)                                                                        | 7236.1(4)                                                                      | 7233.7(3)                                                                      |
| $Z$                          | 4                                                                                    | 4                                                                              | 4                                                                              | 4                                                                              |
| $D_c$ [g/cm <sup>3</sup> ]   | 1.61                                                                                 | 1.624                                                                          | 1.637                                                                          | 1.646                                                                          |
| $\mu$ (mm <sup>-1</sup> )    | 2.002                                                                                | 2.245                                                                          | 4.896                                                                          | 2.655                                                                          |
| $F(000)$                     | 3558                                                                                 | 3568                                                                           | 3576.0                                                                         | 3584.0                                                                         |
| Reflections collected        | 31944                                                                                | 73874                                                                          | 26228                                                                          | 32154                                                                          |
| Unique reflections           | 15387                                                                                | 14866                                                                          | 12649                                                                          | 14771                                                                          |
| Goodness-of-fit              | 0.996                                                                                | 1.168                                                                          | 1.021                                                                          | 1.008                                                                          |
| $R_1^a$ ( $I > 2\sigma(I)$ ) | 0.0387                                                                               | 0.0686                                                                         | 0.0358                                                                         | 0.0654                                                                         |
| $wR_2^b$ (all data)          | 0.0872                                                                               | 0.1402                                                                         | 0.0954                                                                         | 0.1177                                                                         |
| $R(\text{int})$              | 0.0369                                                                               | 0.0793                                                                         | 0.0276                                                                         | 0.0808                                                                         |

$$^a R_1 = \frac{\sum |F_o| - |F_c|}{\sum |F_o|}, \quad ^b wR_2 = \left[ \frac{\sum [w(F_o^2 - F_c^2)^2]}{\sum w(F_o^2)^2} \right]^{1/2}$$

**Table S3.** Crystallographic data for compounds **7a-10a**

|                   | <b>7a</b>                                                                      | <b>8a</b>                                                                      | <b>9a</b>                                                                      | <b>10a</b>                                                                     |
|-------------------|--------------------------------------------------------------------------------|--------------------------------------------------------------------------------|--------------------------------------------------------------------------------|--------------------------------------------------------------------------------|
| Empirical formula | C <sub>84</sub> H <sub>83</sub> Tb <sub>2</sub> N <sub>5</sub> O <sub>26</sub> | C <sub>84</sub> H <sub>83</sub> Ho <sub>2</sub> N <sub>5</sub> O <sub>26</sub> | C <sub>84</sub> H <sub>83</sub> Er <sub>2</sub> N <sub>5</sub> O <sub>26</sub> | C <sub>84</sub> H <sub>83</sub> Yb <sub>2</sub> N <sub>5</sub> O <sub>26</sub> |
| Formula weight    | 1896.38                                                                        | 1908.35                                                                        | 1913.06                                                                        | 1924.62                                                                        |
| $T$ (K)           | 291.15                                                                         | 291.15                                                                         | 291.15                                                                         | 291.15                                                                         |
| crystal system    | orthorhombic                                                                   | orthorhombic                                                                   | orthorhombic                                                                   | orthorhombic                                                                   |
| space group       | <i>Pna</i> 2 <sub>1</sub>                                                      | <i>Pna</i> 2 <sub>1</sub>                                                      | <i>Pna</i> 2 <sub>1</sub>                                                      | <i>Pna</i> 2 <sub>1</sub>                                                      |
| $a$ (Å)           | 19.1407(3)                                                                     | 19.0994(2)                                                                     | 19.0983(3)                                                                     | 19.08923(19)                                                                   |
| $b$ (Å)           | 14.4612(2)                                                                     | 14.41797(17)                                                                   | 14.4221(3)                                                                     | 14.38724(17)                                                                   |
| $c$ (Å)           | 30.6467(6)                                                                     | 30.5930(5)                                                                     | 30.5560(10)                                                                    | 30.5462(4)                                                                     |
| $\alpha$ (°)      | 90.00                                                                          | 90.00                                                                          | 90.00                                                                          | 90.00                                                                          |
| $\beta$ (°)       | 90.00                                                                          | 90.00                                                                          | 90.00                                                                          | 90.00                                                                          |
| $\gamma$ (°)      | 90.00                                                                          | 90.00                                                                          | 90.00                                                                          | 90.00                                                                          |

|                            |           |             |           |             |
|----------------------------|-----------|-------------|-----------|-------------|
| $V(\text{\AA}^3)$          | 8482.9(2) | 8424.51(19) | 8416.3(4) | 8389.26(17) |
| Z                          |           | 4           | 4         | 4           |
| $D_c$ [g/cm <sup>3</sup> ] |           | 1.498       | 1.508     | 1.522       |
| $\mu$ (mm <sup>-1</sup> )  |           | 1.945       | 2.061     | 2.296       |
| $F(000)$                   |           | 3824        | 3856      | 3872        |
| Reflections collected      |           | 22596       | 27069     | 44578       |
| Unique reflections         |           | 12351       | 11460     | 16301       |
| Goodness-of-fit            |           | 1.057       | 1.039     | 1.051       |
| $R^a$ ( $I > 2\sigma(I)$ ) |           | 0.0347      | 0.0423    | 0.0409      |
| $wR^b$ (all data)          |           | 0.0889      | 0.1025    | 0.0986      |
| $R$ (int)                  |           | 0.0228      | 0.0462    | 0.0396      |

$^a R_1 = \sum ||F_o| - |F_c|| / \sum |F_o|$ .  $^b wR_2 = [\sum [w(F_o^2 - F_c^2)^2] / \sum w(F_o^2)^2]^{1/2}$

**Table S4.** Crystallographic data for the Solvent Exchanged Compounds of **8a**

|                            | <b>8a/acetone</b>                                               | <b>8a/dry</b>                                                   | <b>8a/H<sub>2</sub>O</b>                                        | <b>8a/ EtOH</b>                                                                | <b>8a/acetone'</b>                                              |
|----------------------------|-----------------------------------------------------------------|-----------------------------------------------------------------|-----------------------------------------------------------------|--------------------------------------------------------------------------------|-----------------------------------------------------------------|
| Empirical formula          | C <sub>75</sub> H <sub>68</sub> Ho <sub>2</sub> O <sub>27</sub> | C <sub>69</sub> H <sub>50</sub> Ho <sub>2</sub> O <sub>22</sub> | C <sub>69</sub> H <sub>68</sub> Ho <sub>2</sub> O <sub>31</sub> | C <sub>79</sub> H <sub>78</sub> Ho <sub>2</sub> N <sub>2</sub> O <sub>28</sub> | C <sub>75</sub> H <sub>68</sub> Ho <sub>2</sub> O <sub>27</sub> |
| Formula weight             | 1731.09                                                         | 1560.95                                                         | 1722.95                                                         | 1833.23                                                                        | 1731.11                                                         |
| $T$ (K)                    | 291.15                                                          | 291.15                                                          | 291.15                                                          | 291.15                                                                         | 291.15                                                          |
| crystal system             | orthorhombic                                                    | orthorhombic                                                    | orthorhombic                                                    | orthorhombic                                                                   | orthorhombic                                                    |
| space group                | Pna2 <sub>1</sub>                                               | Pna2 <sub>1</sub>                                               | Pna2 <sub>1</sub>                                               | Pna2 <sub>1</sub>                                                              | Pna2 <sub>1</sub>                                               |
| $a$ (\AA)                  | 19.1046(4)                                                      | 19.1289(5)                                                      | 19.0413(9)                                                      | 19.0988(3)                                                                     | 19.1050(5)                                                      |
| $b$ (\AA)                  | 13.9553(3)                                                      | 13.8909(5)                                                      | 13.9578(5)                                                      | 14.3508(3)                                                                     | 13.9575(6)                                                      |
| $c$ (\AA)                  | 30.1931(8)                                                      | 30.0581(11)                                                     | 30.1263(15)                                                     | 30.9762(5)                                                                     | 30.2155(9)                                                      |
| $\alpha$ (°)               | 90                                                              | 90.00                                                           | 90                                                              | 90                                                                             | 90                                                              |
| $\beta$ (°)                | 90                                                              | 90.00                                                           | 90                                                              | 90                                                                             | 90                                                              |
| $\gamma$ (°)               | 90                                                              | 90.00                                                           | 90                                                              | 90                                                                             | 90                                                              |
| $V$ (\AA <sup>3</sup> )    | 8049.83(3)                                                      | 7987.0(5)                                                       | 8006.8(6)                                                       | 8490.1(3)                                                                      | 8057.2(5)                                                       |
| Z                          | 4                                                               | 4                                                               | 4                                                               | 4                                                                              | 4                                                               |
| $D_c$ [g/cm <sup>3</sup> ] | 1.395                                                           | 1.298                                                           | 1.414                                                           | 1.403                                                                          | 1.396                                                           |
| $\mu$ (mm <sup>-1</sup> )  | 4.163                                                           | 4.123                                                           | 2.040                                                           | 3.995                                                                          | 2.021                                                           |
| $F(000)$                   | 3376.0                                                          | 3096.0                                                          | 3384.0                                                          | 3600.0                                                                         | 3384.0                                                          |
| $R^a$ ( $I > 2\sigma(I)$ ) | 0.0490                                                          | 0.0699                                                          | 0.0649                                                          | 0.0771                                                                         | 0.0537                                                          |
| $wR^b$ (all data)          | 0.1394                                                          | 0.1913                                                          | 0.1642                                                          | 0.2072                                                                         | 0.1148                                                          |
| $R$ (int)                  | 0.0275                                                          | 0.0828                                                          | 0.0584                                                          | 0.0469                                                                         | 0.0523                                                          |

$^a R_1 = \sum ||F_o| - |F_c|| / \sum |F_o|$ .  $^b wR_2 = [\sum [w(F_o^2 - F_c^2)^2] / \sum w(F_o^2)^2]^{1/2}$

**Table S5.** Selected Bond Distances (\AA) and Angles (°) for Compounds **1–10** and **8a–10a**.

| Compound 1  |          |             |          |
|-------------|----------|-------------|----------|
| Ce(1)–O(1)  | 2.402(3) | Ce(2)–O(2)  | 2.478(3) |
| Ce(1)–O(4)  | 2.490(3) | Ce(2)–O(7)  | 2.439(3) |
| Ce(1)–O(5)  | 2.586(3) | Ce(2)–O(10) | 2.539(3) |
| Ce(1)–O(8)  | 2.451(3) | Ce(2)–O(11) | 2.586(3) |
| Ce(1)–O(13) | 2.471(4) | Ce(2)–O(14) | 2.484(3) |
| Ce(1)–O(16) | 2.452(3) | Ce(2)–O(17) | 2.429(3) |
| Ce(1)–O(21) | 2.556(3) | Ce(2)–O(19) | 2.467(3) |
| Ce(1)–O(22) | 2.553(4) | Ce(2)–O(20) | 2.529(4) |

|                                              |            |                              |            |
|----------------------------------------------|------------|------------------------------|------------|
| O(1)–Ce(1)–O(4)                              | 143.51(12) | O(1)–Ce(1)–O(4)              | 142.16(12) |
| O(1)–Ce(1)–O(8)                              | 129.22(12) | O(2)–Ce(2)–O(10)             | 81.97(11)  |
| O(2)–Ce(2)–O(11)                             | 69.21(11)  | O(2)–Ce(2)–O(14)             | 74.52(13)  |
| <b>Compound 2</b>                            |            |                              |            |
| Pr(1)–O(2)                                   | 2.4062(19) | Pr(2)–O(1)                   | 2.4325(17) |
| Pr(1)–O(5) <sup>1</sup>                      | 2.4628(18) | Pr(2)–O(4) <sup>1</sup>      | 2.438(2)   |
| Pr(1)–O(8)                                   | 2.461(2)   | Pr(2)–O(7)                   | 2.3950(19) |
| Pr(1)–O(16)                                  | 2.5236(19) | Pr(2)–O(10)                  | 2.4863(19) |
| Pr(1)–O(17)                                  | 2.5725(18) | Pr(2)–O(11)                  | 2.5714(18) |
| Pr(1)–O(19)                                  | 2.449(2)   | Pr(2)–O(14)                  | 2.438(2)   |
| Pr(1)–O(20)                                  | 2.543(2)   | Pr(2)–O(21)                  | 2.536(2)   |
| Pr(1)–O(13)                                  | 2.4243(19) | Pr(2)–O(22)                  | 2.5447(19) |
| O(2)–Pr(1)–O(5) <sup>1</sup>                 | 134.88(8)  | O(2)–Pr(1)–O(8)              | 75.28(7)   |
| O(2)–Pr(1)–O(13)                             | 74.21(7)   | O(1)–Pr(2)–O(4) <sup>1</sup> | 108.13(8)  |
| O(1)–Pr(2)–O(10)                             | 96.80(7)   | O(1)–Pr(2)–O(11)             | 134.97(7)  |
| <sup>1</sup> <sub>-1+X, 1/2-Y, -1/2+Z;</sub> |            |                              |            |
| <b>Compound 3</b>                            |            |                              |            |
| Nd(1)–O(7)                                   | 2.511(2)   | Nd(2)–O(11)                  | 2.427(3)   |
| Nd(1)–O(8)                                   | 2.553(2)   | Nd(2)–O(13)                  | 2.415(2)   |
| Nd(1)–O(10)                                  | 2.406(2)   | Nd(2)–O(21)                  | 2.526(3)   |
| Nd(1)–O(17) <sup>2</sup>                     | 2.440(3)   | Nd(2)–O(22)                  | 2.521(3)   |
| Nd(1)–O(2)                                   | 2.433(3)   | Nd(2)–O(1)                   | 2.367(2)   |
| Nd(1)–O(14)                                  | 2.389(3)   | Nd(2)–O(16) <sup>2</sup>     | 2.404(3)   |
| Nd(1)–O(20)                                  | 2.516(3)   | Nd(2)–O(5)                   | 2.553(2)   |
| Nd(1)–O(19)                                  | 2.428(3)   | Nd(2)–O(4)                   | 2.462(3)   |
| O(7)–Nd(1)–O(8)                              | 51.33(8)   | O(11)–Nd(2)–O(21)            | 139.97(8)  |
| O(7)–Nd(1)–O(20)                             | 75.31(9)   | O(11)–Nd(2)–O(22)            | 141.99(9)  |
| O(10)–Nd(1)–O(7)                             | 150.80(9)  | O(13)–Nd(2)–O(5)             | 135.18(9)  |
| <sup>2</sup> <sub>-1+X, 1/2-Y, -1/2+Z</sub>  |            |                              |            |
| <b>Compound 4</b>                            |            |                              |            |
| Sm(1)–O(2)                                   | 2.408(2)   | Sm(2)–O(1)                   | 2.349(2)   |
| Sm(1)–O(7)                                   | 2.480(2)   | Sm(2)–O(4)                   | 2.444(2)   |
| Sm(1)–O(8)                                   | 2.524(2)   | Sm(2)–O(5)                   | 2.529(2)   |
| Sm(1)–O(11)                                  | 2.4057(19) | Sm(2)–O(10)                  | 2.356(2)   |
| Sm(1)–O(14)                                  | 2.363(2)   | Sm(2)–O(13)                  | 2.3887(19) |
| Sm(1)–O(16)                                  | 2.374(2)   | Sm(2)–O(17)                  | 2.397(2)   |
| Sm(1)–O(19)                                  | 2.510(2)   | Sm(2)–O(20)                  | 2.505(2)   |
| Sm(1)–O(22)                                  | 2.402(2)   | Sm(2)–O(21)                  | 2.487(2)   |
| O(2)–Sm(1)–O(7)                              | 82.21(7)   | O(1)–Sm(2)–O(4)              | 144.38(8)  |
| O(2)–Sm(1)–O(8)                              | 70.34(7)   | O(1)–Sm(2)–O(5)              | 141.96(7)  |
| O(11)–Sm(1)–O(7)                             | 80.09(8)   | O(10)–Sm(2)–O(4)             | 136.49(8)  |
| <b>Compound 5</b>                            |            |                              |            |
| Eu(1)–O(1)                                   | 2.351(3)   | Eu(2)–O(2)                   | 2.375(3)   |
| Eu(1)–O(6) <sup>1</sup>                      | 2.397(3)   | Eu(2)–O(5) <sup>1</sup>      | 2.338(3)   |

|                          |            |                          |            |
|--------------------------|------------|--------------------------|------------|
| Eu(1)–O(7)               | 2.509(2)   | Eu(2)–O(11) <sup>2</sup> | 2.379(3)   |
| Eu(1)–O(8)               | 2.472(3)   | Eu(2)–O(14)              | 2.334(3)   |
| Eu(1)–O(12) <sup>2</sup> | 2.355(3)   | Eu(2)–O(17) <sup>3</sup> | 2.518(3)   |
| Eu(1)–O(13)              | 2.386(3)   | Eu(2)–O(18) <sup>3</sup> | 2.431(3)   |
| Eu(1)–O(21)              | 2.384(3)   | Eu(2)–O(19)              | 2.485(3)   |
| Eu(1)–O(22)              | 2.500(3)   | Eu(2)–O(20)              | 2.468(3)   |
| O(1)–Eu(1)–O(7)          | 78.58(9)   | O(2)–Eu(2)–O(19)         | 75.28(10)  |
| O(1)–Eu(1)–O(8)          | 130.50(9)  | O(2)–Eu(2)–O(20)         | 144.72(11) |
| O(1)–Eu(1)–O(22)         | 142.12(10) | O(2)–Eu(2)–O(14)         | 81.52(10)  |

<sup>1</sup><sub>-1+X, 1/2-Y, -1/2+Z</sub>; <sup>2</sup><sub>2-X, -1/2+Y, 3/2-Z</sub>; <sup>3</sup><sub>1-X, -1/2+Y, 3/2-Z</sub>

#### Compound 6

|                          |           |                  |            |
|--------------------------|-----------|------------------|------------|
| Gd(1)–O(2)               | 2.341(3)  | Gd(2)–O(1)       | 2.364(2)   |
| Gd(1)–O(6) <sup>1</sup>  | 2.384(3)  | Gd(2)–O(11)#2    | 2.371(3)   |
| Gd(1)–O(7)               | 2.497(2)  | Gd(2)–O(14)      | 2.325(2)   |
| Gd(1)–O(8)               | 2.459(2)  | Gd(2)–O(17)#3    | 2.511(2)   |
| Gd(1)–O(12) <sup>2</sup> | 2.348(2)  | Gd(2)–O(18)#3    | 2.424(3)   |
| Gd(1)–O(13)              | 2.376(3)  | Gd(2)–O(19)      | 2.469(3)   |
| Gd(1)–O(21)              | 2.374(3)  | Gd(2)–O(20)      | 2.463(3)   |
| Gd(1)–O(22)              | 2.484(3)  | Gd(2)–O(1A)#1    | 2.844(4)   |
| O(2)–Gd(1)–O(7)          | 78.55(9)  | O(1)–Gd(2)–O(19) | 75.07(10)  |
| O(2)–Gd(1)–O(8)          | 130.66(9) | O(1)–Gd(2)–O(20) | 144.39(11) |
| O(2)–Gd(1)–O(13)         | 76.19(10) | O(1)–Gd(2)–O(14) | 81.17(10)  |

<sup>1</sup><sub>-1+X, 1/2-Y, -1/2+Z</sub>; <sup>2</sup><sub>2-X, -1/2+Y, 1/2-Z</sub>; <sup>3</sup><sub>1-X, -1/2+Y, 1/2-Z</sub>

#### Compound 7

|                  |           |                  |           |
|------------------|-----------|------------------|-----------|
| Tb(1)–O(1)       | 2.452(2)  | Tb(2)–O(5)       | 2.355(2)  |
| Tb(1)–O(2)       | 2.482(2)  | Tb(2)–O(7)       | 2.3480(2) |
| Tb(1)–O(4)       | 2.326(2)  | Tb(2)–O(10)      | 2.299(2)  |
| Tb(1)–O(8)       | 2.3309(2) | Tb(2)–O(13)      | 2.303(2)  |
| Tb(1)–O(11)      | 2.3649(2) | Tb(2)–O(16)      | 2.410(2)  |
| Tb(1)–O(14)      | 2.362(2)  | Tb(2)–O(17)      | 2.494(2)  |
| Tb(1)–O(19)      | 2.473(2)  | Tb(2)–O(20)      | 2.433(2)  |
| Tb(1)–O(22)      | 2.360(2)  | Tb(2)–O(21)      | 2.4591(2) |
| O(1)–Tb(1)–O(2)  | 52.80(6)  | O(5)–Tb(2)–O(16) | 83.01(8)  |
| O(1)–Tb(1)–O(19) | 74.37(7)  | O(5)–Tb(2)–O(17) | 72.03(7)  |
| O(4)–Tb(1)–O(1)  | 150.79(7) | O(5)–Tb(2)–O(20) | 142.03(8) |

#### Compound 8

|                          |          |                          |          |
|--------------------------|----------|--------------------------|----------|
| Ho (1)–O(1)              | 2.421(3) | Ho (2)–O(5) <sup>1</sup> | 2.331(4) |
| Ho (1)–O(2)              | 2.456(3) | Ho(2)–O(7)               | 2.291(3) |
| Ho (1)–O(4) <sup>1</sup> | 2.303(3) | Ho(2)–O(10)              | 2.389(3) |
| Ho (1)–O(8)              | 2.331(4) | Ho(2)–O(11)              | 2.476(3) |
| Ho (1)–O(14)             | 2.341(3) | Ho(2)–O(13)              | 2.272(4) |
| Ho (1)–O(17)             | 2.309(3) | Ho(2)–O(16)              | 2.317(3) |
| Ho (1)–O(19)             | 2.330(4) | Ho(2)–O(21)              | 2.432(3) |
| Ho (1)–O(20)             | 2.465(4) | Ho(2)–O(22)              | 2.406(4) |

|                                           |            |                                 |            |
|-------------------------------------------|------------|---------------------------------|------------|
| O(1)–Ho (1)–O(2)                          | 53.31(11)  | O(5) <sup>1</sup> –Ho (2)–O(11) | 72.11(13)  |
| O(1)–Ho (1)–O(20)                         | 74.10(12)  | O(5) <sup>1</sup> –Ho (2)–O(21) | 138.96(12) |
| O(2)–Ho (1)–O(20)                         | 115.04(12) | O(5) <sup>1</sup> –Ho (2)–O(22) | 142.28(13) |
| O(4) <sup>1</sup> –Ho (1)–O(1)            | 150.27(12) | O(5) <sup>1</sup> –Ho (2)–O(7)  | 128.26(13) |
| O(4) <sup>1</sup> –Ho (1)–O(2)            | 147.10(11) | O(7)–Ho (2)–O(10)               | 144.98(13) |
| O(4) <sup>1</sup> –Ho (1)–O(8)            | 120.64(13) | O(7)–Ho (2)–O(11)               | 142.03(12) |
| <sup>1</sup> <sub>1-x, 1/2+y, 3/2-z</sub> |            |                                 |            |
| <b>Compound 9</b>                         |            |                                 |            |
| Er(1)–O(1)                                | 2.374(3)   | Er(2)–O(5) <sup>1</sup>         | 2.324(3)   |
| Er(1)–O(2)                                | 2.471(3)   | Er(2)–O(8)                      | 2.300(3)   |
| Er(1)–O(4)1                               | 2.274(3)   | Er(2)–O(11)                     | 2.325(3)   |
| Er(1)–O(7)                                | 2.313(3)   | Er(2)–O(13)                     | 2.293(3)   |
| Er(1)–O(10)                               | 2.251(3)   | Er(2)–O(16)                     | 2.407(3)   |
| Er(1)–O(14)                               | 2.322(3)   | Er(2)–O(17)                     | 2.454(3)   |
| Er(1)–O(19)                               | 2.393(3)   | Er(2)–O(21)                     | 2.452(3)   |
| Er(1)–O(20)                               | 2.427(3)   | Er(2)–O(22)                     | 2.321(3)   |
| O(4) <sup>1</sup> –Er(1)–O(1)             | 145.05(11) | O(5) <sup>1</sup> –Er(2)–O(11)  | 75.13(11)  |
| O(4) <sup>1</sup> –Er(1)–O(2)             | 142.03(10) | O(5) <sup>1</sup> –Er(2)–O(16)  | 82.56(10)  |
| O(4) <sup>1</sup> –Er(1)–O(7)             | 80.66(11)  | O(5) <sup>1</sup> –Er(2)–O(17)  | 71.62(10)  |
| <sup>1</sup> <sub>1-x, 1/2+y, 3/2-z</sub> |            |                                 |            |
| <b>Compound 10</b>                        |            |                                 |            |
| Yb(1)–O(1)                                | 2.239(3)   | Yb(2)–O(2)                      | 2.312(3)   |
| Yb(1)–O(4)                                | 2.298(3)   | Yb(2)–O(5)                      | 2.278(3)   |
| Yb(1)–O(7)                                | 2.356(3)   | Yb(2)–O(11)                     | 2.297(3)   |
| Yb(1)–O(8)                                | 2.457(3)   | Yb(2)–O(13)                     | 2.394(3)   |
| Yb(1)–O(10)                               | 2.248(3)   | Yb(2)–O(14)                     | 2.445(3)   |
| Yb(1)–O(17)                               | 2.296(3)   | Yb(2)–O(16)                     | 2.270(3)   |
| Yb(1)–O(19)                               | 2.425(3)   | Yb(2)–O(21)                     | 2.451(3)   |
| Yb(1)–O(20)                               | 2.394(3)   | Yb(2)–O(22)                     | 2.300(3)   |
| O(1)–Yb(1)–O(4)                           | 113.34(12) | O(1)–Yb(2)–O(13)                | 82.99(11)  |
| O(1)–Yb(1)–O(7)                           | 134.20(11) | O(1)–Yb(2)–O(14)                | 127.62(11) |
| O(1)–Yb(1)–O(8)                           | 80.95(11)  | O(1)–Yb(2)–O(21)                | 70.83(11)  |
| <b>Compound 8a</b>                        |            |                                 |            |
| Ho (1)–O(2)                               | 2.310(3)   | Ho (2)–O(1)                     | 2.350(3)   |
| Ho (1)–O(4) <sup>1</sup>                  | 2.384(3)   | Ho(2)–O(5) <sup>1</sup>         | 2.328(3)   |
| Ho (1)–O(5) <sup>1</sup>                  | 2.676(3)   | Ho(2)–O(10)                     | 2.438(3)   |
| Ho (1)–O(8)                               | 2.284(3)   | Ho(2)–O(11)                     | 2.420(3)   |
| Ho (1)–O(14)                              | 2.303(3)   | Ho(2)–O(13)                     | 2.340(3)   |
| Ho (1)–O(16)                              | 2.254(3)   | Ho(2)–O(22)                     | 2.359(3)   |
| Ho (1)–O(19)                              | 2.358(3)   | Ho(2)–O(17)                     | 2.388(3)   |
| Ho (1)–O(21)                              | 2.319(4)   | Ho(2)–O(20)                     | 2.384(3)   |
| O(2)–Ho (1)–O(4) <sup>1</sup>             | 82.99(12)  | O(1)–Ho (2)–O(11)               | 146.30(11) |
| O(2)–Ho (1)–O(5) <sup>1</sup>             | 71.42(9)   | O(1)–Ho (2)–O(16)               | 66.31(9)   |
| O(2)–Ho (1)–O(19)                         | 131.89(12) | O(1)–Ho (2)–O(17)               | 78.54(11)  |

|                                             |            |                          |            |
|---------------------------------------------|------------|--------------------------|------------|
| O(4) <sup>1</sup> –Ho (1)–O(5) <sup>1</sup> | 50.59(10)  | O(16)–Ho (2)–O(21)       | 152.58(14) |
| <sup>1</sup> -1/2+X,3/2-Y,+Z                |            |                          |            |
| <b>Compound 9a</b>                          |            |                          |            |
| Er(1)–O(4)                                  | 2.428(6)   | Er(2)–O(2)               | 2.271(7)   |
| Er(1)–O(5)                                  | 2.401(6)   | Er(2)–O(7)               | 2.297(5)   |
| Er(1)–O(8)                                  | 2.331(5)   | Er(2)–O(10)              | 2.680(6)   |
| Er(1)–O(10)                                 | 2.298(6)   | Er(2)–O(11)              | 2.367(6)   |
| Er(1)–O(13)                                 | 2.324(5)   | Er(2)–O(14)              | 2.299(6)   |
| Er(1)–O(17)                                 | 2.374(5)   | Er(2)–O(16)              | 2.252(6)   |
| Er(1)–O(19)                                 | 2.370(6)   | Er(2)–O(20)              | 2.356(6)   |
| Er(1)–O(21)                                 | 2.340(6)   | Er(2)–O(22)              | 2.306(7)   |
| O(8)– Er(1)–O(4)                            | 140.47(19) | O(2)– Er(2)–O(10)        | 141.25(18) |
| O(8)– Er(1)–O(5)                            | 146.6(2)   | O(2)– Er(2)–O(11)        | 109.8(2)   |
| O(8)– Er(1)–O(17)                           | 78.1(2)    | O(2)– Er(2)–O(14)        | 149.0(2)   |
| <b>Compound 10a</b>                         |            |                          |            |
| Yb(1)–O(17) <sup>1</sup>                    | 2.314(3)   | Yb(2)–O(4)               | 2.213(3)   |
| Yb(1)–O(13)                                 | 2.275(3)   | Yb(2)–O(13)              | 2.726(3)   |
| Yb(1)–O(5)                                  | 2.354(3)   | Yb(2)–O(8)               | 2.270(3)   |
| Yb(1)–O(11)                                 | 2.373(3)   | Yb(2)–O(14)              | 2.348(3)   |
| Yb(1)–O(22)                                 | 2.357(3)   | Yb(2)–O(21)              | 2.336(3)   |
| Yb(1)–O(10)                                 | 2.421(3)   | Yb(2)–O(2)               | 2.280(3)   |
| Yb(1)–O(1)                                  | 2.300(3)   | Yb(2)–O(19)              | 2.284(4)   |
| Yb(1)–O(20)                                 | 2.319(3)   | Yb(2)–O(16) <sup>1</sup> | 2.275(3)   |
| O(13)– Yb(1)–O(4)                           | 73.93(10)  | O(4)– Yb(2)–O(13)        | 80.21(11)  |
| O(13)– Yb(1)–O(5)                           | 120.67(11) | O(4)– Yb(2)–O(8)         | 104.67(14) |
| O(31)– Yb(1)–O(11)                          | 100.97(11) | O(4)– Yb(2)–O(14)        | 130.34(12) |
| <sup>1</sup> -1/2+X,1/2-Y,+Z                |            |                          |            |

**Table S6.** Selected Bond Distances (Å) for and the Solvent Exchanged Compounds of **8a**

|                                             |          |                         |          |
|---------------------------------------------|----------|-------------------------|----------|
| <b>Compound 8a/acetone</b>                  |          |                         |          |
| Ho(1)–O(20)                                 | 2.429(5) | Ho(2)–O(1)              | 2.271(5) |
| Ho(1)–O(2)                                  | 2.376(5) | Ho(2)–O(5)              | 2.288(5) |
| Ho(1)–O(4)                                  | 2.336(4) | Ho(2)–O(7)              | 2.616(6) |
| Ho(1)–O(7)                                  | 2.317(5) | Ho(2)–O(8)              | 2.373(5) |
| Ho(1)–O(11)                                 | 2.352(5) | Ho(2)–O(10)             | 2.309(4) |
| Ho(1)–O(16) <sup>1</sup>                    | 2.388(6) | Ho(2)–O(14)             | 2.263(6) |
| Ho(1)–O(17) <sup>1</sup>                    | 2.402(6) | Ho(2)–O(21)             | 2.365(5) |
| Ho(1)–O(19)                                 | 2.387(6) | Ho(2)–O(22)             | 2.414(7) |
| <sup>1</sup> <sub>3/2-X, 1/2+Y, 1/2+Z</sub> |          |                         |          |
| <b>Compound 8a/dry</b>                      |          |                         |          |
| Ho(1)–O(1)                                  | 2.305(7) | Ho(2)–O(2)              | 2.363(6) |
| Ho(1)–O(4) <sup>1</sup>                     | 2.281(6) | Ho(2)–O(22)             | 2.428(8) |
| Ho(1)–O(7)                                  | 2.599(7) | Ho(2)–O(5) <sup>1</sup> | 2.383(6) |

|                          |          |                          |          |
|--------------------------|----------|--------------------------|----------|
| Ho(1)–O(8)               | 2.410(6) | Ho(2)–O(7)               | 2.349(6) |
| Ho(1)–O(10) <sup>2</sup> | 2.326(5) | Ho(2)–O(11) <sup>2</sup> | 2.351(7) |
| Ho(1)–O(14)              | 2.242(7) | Ho(2)–O(16)              | 2.370(7) |
| Ho(1)–O(19)              | 2.397(9) | Ho(2)–O(17)              | 2.401(8) |
| Ho(1)–O(20)              | 2.354(7) | Ho(2)–O(21)              | 2.465(7) |

<sup>1</sup>-1/2+X,3/2-Y,+Z; <sup>2</sup>-1/2+X,1/2-Y,+Z

#### Compound 8a/H<sub>2</sub>O

|                          |          |                          |          |
|--------------------------|----------|--------------------------|----------|
| Ho(1)–O(4) <sup>4</sup>  | 2.464(6) | Ho(2)–O(2)               | 2.300(6) |
| Ho(1)–O(5) <sup>4</sup>  | 2.394(6) | Ho(2)–O(7)               | 2.321(5) |
| Ho(1)–O(8)               | 2.368(5) | Ho(2)–O(10) <sup>6</sup> | 2.716(7) |
| Ho(1)–O(10) <sup>6</sup> | 2.337(6) | Ho(2)–O(11) <sup>6</sup> | 2.353(7) |
| Ho(1)–O(13)              | 2.312(6) | Ho(2)–O(14)              | 2.328(5) |
| Ho(1)–O(17) <sup>5</sup> | 2.398(6) | Ho(2)–O(16) <sup>5</sup> | 2.259(6) |
| Ho(1)–O(19)              | 2.403(6) | Ho(2)–O(21)              | 2.326(8) |
| Ho(1)–O(20)              | 2.421(6) | Ho(2)–O(22)              | 2.393(6) |

<sup>4</sup>1/2-X,1/2+Y,1/2+Z; <sup>5</sup>1/2+X,3/2-Y,+Z; <sup>6</sup>-1/2+X,1/2-Y,+Z.

#### Compound 8a/EtOH

|             |          |             |          |
|-------------|----------|-------------|----------|
| Ho(1)–O(2)  | 2.320(6) | Ho(2)–O(4)  | 2.451(6) |
| Ho(1)–O(8)  | 2.323(6) | Ho(2)–O(5)  | 2.438(7) |
| Ho(1)–O(10) | 2.295(6) | Ho(2)–O(7)  | 2.303(6) |
| Ho(1)–O(13) | 2.312(5) | Ho(2)–O(11) | 2.395(6) |
| Ho(1)–O(16) | 2.647(7) | Ho(2)–O(14) | 2.366(6) |
| H(1)–O(17)  | 2.391(6) | Ho(2)–O(16) | 2.338(6) |
| Ho(1)–O(19) | 2.236(7) | Ho(2)–O(21) | 2.321(6) |
| Ho(1)–O(20) | 2.354(7) | Ho(2)–O(22) | 2.378(6) |
